# Supplementary material
Source: publisher figshare collection journal article supplement (https://acs.figshare.com/ndownloader/files/4107301)
Supplement: Supplementary file 1 [file 4107301]

**Supporting Information**

**Iron-Amide-Sulfide and Iron-Imide-Sulfide Clusters: Heteroligated  
Core Environments Relevant to the Nitrogenase FeMo Cofactor**

**Xu-Dong Chen,<sup>†</sup> Wei Zhang,<sup>‡</sup> Jeremiah S. Duncan<sup>‡</sup> and Sonny C. Lee\***

*Department of Chemistry, University of Waterloo, Waterloo, ON, Canada N2L 3G1. E-mail:  
slee@uwaterloo.ca*

*<sup>†</sup>Current Address: Department of Chemistry and Chemical Biology, Harvard University,  
Cambridge, MA, USA 02318*

*<sup>‡</sup>Current Address: Department of Atmospheric Science and Chemistry, Plymouth State  
University, Plymouth, NH, USA 03264*

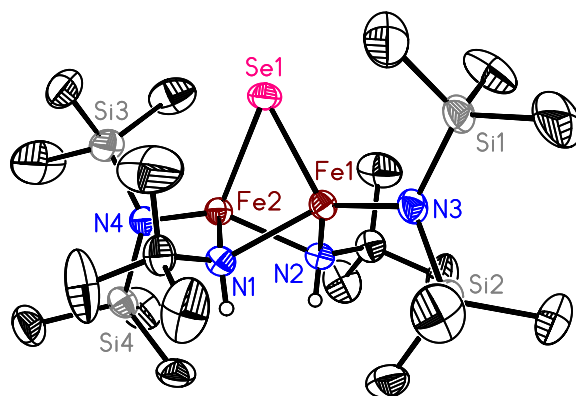

$\text{Fe}_2(\text{NH}^t\text{Bu})_2\text{Se}[\text{N}(\text{SiMe}_3)_2]_2$  (**7-Se**)

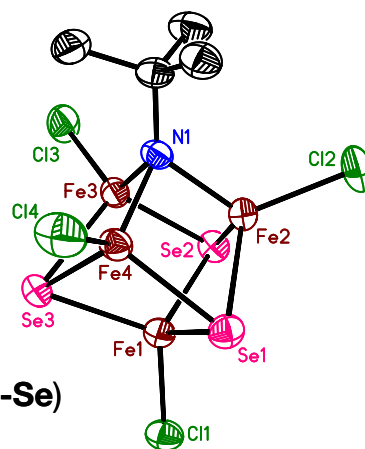

$[\text{Fe}_4(\text{N}^t\text{Bu})\text{Se}_3\text{Cl}_4]^{2-}$  (**10-Se**)

**Figure S1** Structures of selenide-substituted clusters **7-Se** and **10-Se**, showing non-hydrogen atoms (50% probability thermal ellipsoids), amide hydrogens (as small open circles), and selected atom labels.
